# Supplementary material for: Detecting Disease Outbreaks in Mass Gatherings Using Internet Data
Source: PubMed Central journal article supplement (PMC4090384; doi:10.2196/jmir.3156), 2014-06-18
Supplement: jmir_v16i6e154_app1.pdf [file jmir_v16i6e154_app1.pdf]

## Multimedia Appendix 1: Number of tweets containing symptom words for each festival

The table below is a count of the number of tweets which contained a symptom word or its synonyms in each of the festivals analyzed. Only symptoms which had a total of 10 or more appearances are listed.

| Symptom               | Festival  |          |            |           |          |             |      |                 |          |          |
|-----------------------|-----------|----------|------------|-----------|----------|-------------|------|-----------------|----------|----------|
|                       | Wakestock | Wireless | Tinthepark | VFestival | Bestival | Creamfields | Hajj | Isleofwightfest | Download | Rockness |
| <b>Agoraphobia</b>    | 0         | 5        | 8          | 7         | 11       | 7           | 5    | 0               | 0        | 0        |
| <b>Alexia</b>         | 0         | 36       | 20         | 17        | 76       | 12          | 12   | 1               | 0        | 2        |
| <b>Alopecia</b>       | 1         | 17       | 22         | 23        | 14       | 28          | 5    | 0               | 0        | 0        |
| <b>Amnesia</b>        | 1449      | 64       | 64         | 471       | 509      | 3226        | 63   | 3               | 3        | 13       |
| <b>Anorexia</b>       | 59        | 105      | 107        | 201       | 392      | 336         | 100  | 3               | 2        | 14       |
| <b>Anxiety</b>        | 67        | 98       | 111        | 475       | 441      | 391         | 118  | 5               | 7        | 11       |
| <b>Apnea</b>          | 0         | 69       | 69         | 462       | 8560     | 874         | 89   | 0               | 6        | 7        |
| <b>Arachnophobia</b>  | 2         | 12       | 26         | 55        | 17       | 36          | 8    | 0               | 0        | 0        |
| <b>Arrhythmia</b>     | 0         | 0        | 1          | 1         | 2        | 1           | 7    | 0               | 0        | 0        |
| <b>Ataxia</b>         | 0         | 0        | 4          | 0         | 10       | 2           | 4    | 0               | 0        | 0        |
| <b>Back ache</b>      | 4         | 7        | 9          | 14        | 9        | 13          | 28   | 0               | 0        | 0        |
| <b>Belching</b>       | 90        | 73       | 86         | 360       | 296      | 354         | 79   | 3               | 2        | 10       |
| <b>Bleeding</b>       | 268       | 68       | 74         | 1194      | 812      | 1245        | 98   | 10              | 35       | 25       |
| <b>Blindness</b>      | 558       | 66       | 70         | 4558      | 3119     | 3292        | 83   | 25              | 26       | 80       |
| <b>Blister</b>        | 175       | 64       | 65         | 770       | 311      | 621         | 63   | 2               | 10       | 24       |
| <b>Bloating</b>       | 39        | 64       | 60         | 143       | 96       | 256         | 62   | 0               | 2        | 5        |
| <b>Bruise</b>         | 465       | 71       | 67         | 1710      | 805      | 1357        | 74   | 15              | 10       | 25       |
| <b>Childbirth</b>     | 303       | 109      | 108        | 1355      | 1925     | 2573        | 113  | 26              | 21       | 39       |
| <b>Chorea</b>         | 0         | 0        | 0          | 1         | 2        | 4           | 4    | 0               | 0        | 0        |
| <b>Claustrophobia</b> | 12        | 50       | 53         | 129       | 32       | 51          | 48   | 1               | 0        | 1        |

|                         |      |    |     |      |      |       |     |    |    |     |
|-------------------------|------|----|-----|------|------|-------|-----|----|----|-----|
| <b>Constipation</b>     | 27   | 58 | 63  | 165  | 84   | 144   | 65  | 2  | 1  | 1   |
| <b>Convulsion</b>       | 0    | 13 | 29  | 89   | 14   | 8     | 45  | 0  | 1  | 0   |
| <b>Cough</b>            | 665  | 75 | 79  | 3122 | 1526 | 2357  | 78  | 12 | 24 | 51  |
| <b>Cramp</b>            | 227  | 65 | 64  | 696  | 451  | 835   | 65  | 5  | 4  | 13  |
| <b>Deformity</b>        | 37   | 60 | 58  | 117  | 99   | 200   | 61  | 0  | 1  | 0   |
| <b>Depression</b>       | 2739 | 74 | 67  | 8586 | 4696 | 11244 | 71  | 58 | 67 | 144 |
| <b>Diarrhea</b>         | 37   | 92 | 111 | 110  | 103  | 159   | 109 | 0  | 1  | 6   |
| <b>Dizziness</b>        | 308  | 78 | 72  | 436  | 296  | 678   | 88  | 4  | 12 | 12  |
| <b>Dyspepsia</b>        | 11   | 28 | 35  | 28   | 31   | 33    | 47  | 0  | 0  | 0   |
| <b>Edema</b>            | 0    | 4  | 2   | 1    | 0    | 12    | 9   | 0  | 0  | 0   |
| <b>Epistaxis</b>        | 24   | 46 | 60  | 89   | 46   | 80    | 34  | 0  | 0  | 3   |
| <b>Euphoria</b>         | 31   | 61 | 66  | 185  | 315  | 342   | 70  | 3  | 3  | 8   |
| <b>Fever</b>            | 364  | 65 | 64  | 569  | 933  | 1040  | 71  | 17 | 13 | 31  |
| <b>Flatulence</b>       | 570  | 77 | 106 | 2114 | 1447 | 3256  | 82  | 15 | 40 | 39  |
| <b>Hallucination</b>    | 17   | 54 | 58  | 245  | 160  | 153   | 64  | 1  | 0  | 0   |
| <b>Headache</b>         | 683  | 64 | 65  | 3419 | 1383 | 2720  | 65  | 15 | 27 | 26  |
| <b>Hirsutism</b>        | 0    | 0  | 6   | 0    | 7    | 2     | 12  | 0  | 0  | 0   |
| <b>Hyperthermia</b>     | 0    | 16 | 26  | 31   | 12   | 35    | 6   | 0  | 0  | 0   |
| <b>Hyperventilation</b> | 17   | 61 | 58  | 349  | 148  | 49    | 36  | 0  | 0  | 0   |
| <b>Hypothermia</b>      | 15   | 19 | 41  | 22   | 22   | 38    | 27  | 1  | 0  | 1   |
| <b>Impotence</b>        | 2    | 14 | 24  | 28   | 35   | 19    | 59  | 0  | 0  | 11  |
| <b>Infertility</b>      | 10   | 16 | 23  | 12   | 213  | 16    | 61  | 7  | 0  | 1   |
| <b>Insomnia</b>         | 135  | 68 | 69  | 499  | 585  | 1079  | 97  | 3  | 3  | 7   |
| <b>Itch</b>             | 110  | 65 | 64  | 717  | 278  | 586   | 67  | 8  | 15 | 13  |
| <b>Jaundice</b>         | 3    | 7  | 16  | 8    | 13   | 12    | 23  | 0  | 0  | 2   |
| <b>Malaise</b>          | 0    | 9  | 17  | 4    | 46   | 4     | 35  | 0  | 0  | 0   |
| <b>Melena</b>           | 0    | 4  | 3   | 11   | 42   | 34    | 2   | 0  | 0  | 1   |
| <b>Miscarriage</b>      | 4    | 34 | 33  | 24   | 41   | 50    | 55  | 1  | 0  | 0   |
| <b>Nausea</b>           | 1    | 31 | 31  | 27   | 75   | 53    | 60  | 0  | 0  | 0   |
| <b>Nystagmus</b>        | 21   | 0  | 0   | 0    | 0    | 9     | 3   | 0  | 0  | 0   |

|                     |      |     |     |       |      |       |     |     |     |     |
|---------------------|------|-----|-----|-------|------|-------|-----|-----|-----|-----|
| <b>Pain</b>         | 2231 | 87  | 79  | 11368 | 6941 | 11006 | 99  | 86  | 122 | 177 |
| <b>Palpitation</b>  | 2    | 48  | 45  | 48    | 80   | 81    | 45  | 1   | 0   | 2   |
| <b>Paralysis</b>    | 10   | 64  | 76  | 75    | 59   | 123   | 111 | 3   | 2   | 7   |
| <b>Paranoia</b>     | 263  | 125 | 135 | 847   | 764  | 1024  | 129 | 8   | 27  | 23  |
| <b>Persecution</b>  | 1    | 24  | 30  | 44    | 275  | 95    | 69  | 1   | 0   | 3   |
| <b>Perspiration</b> | 637  | 96  | 105 | 4184  | 1975 | 4682  | 116 | 21  | 27  | 53  |
| <b>Phobia</b>       | 62   | 82  | 81  | 366   | 259  | 377   | 114 | 2   | 5   | 10  |
| <b>Rash</b>         | 66   | 65  | 64  | 227   | 271  | 408   | 65  | 3   | 3   | 2   |
| <b>Rigor</b>        | 2    | 10  | 25  | 44    | 52   | 106   | 54  | 1   | 1   | 2   |
| <b>Shivering</b>    | 138  | 64  | 64  | 950   | 454  | 1074  | 66  | 7   | 3   | 14  |
| <b>Sleepy</b>       | 658  | 65  | 70  | 3968  | 1729 | 2964  | 65  | 16  | 32  | 52  |
| <b>Somnolence</b>   | 25   | 46  | 49  | 35    | 40   | 48    | 67  | 0   | 0   | 0   |
| <b>Swelling</b>     | 91   | 64  | 64  | 275   | 254  | 379   | 65  | 3   | 3   | 10  |
| <b>Tachycardia</b>  | 0    | 3   | 2   | 0     | 1    | 0     | 11  | 0   | 0   | 0   |
| <b>Thirst</b>       | 20   | 66  | 64  | 662   | 139  | 216   | 67  | 22  | 24  | 29  |
| <b>Thirsty</b>      | 133  | 64  | 64  | 915   | 406  | 985   | 66  | 6   | 4   | 10  |
| <b>Tinnitus</b>     | 2    | 18  | 48  | 19    | 57   | 66    | 13  | 0   | 0   | 0   |
| <b>Tired</b>        | 5009 | 143 | 137 | 24094 | 9624 | 19008 | 107 | 145 | 158 | 282 |
| <b>Toothache</b>    | 40   | 61  | 64  | 169   | 64   | 242   | 61  | 0   | 2   | 1   |
| <b>Tremor</b>       | 809  | 86  | 91  | 5172  | 4462 | 5410  | 120 | 46  | 56  | 139 |
| <b>Urticaria</b>    | 10   | 55  | 64  | 162   | 578  | 263   | 57  | 0   | 12  | 19  |
| <b>Vertigo</b>      | 13   | 25  | 44  | 50    | 329  | 174   | 32  | 0   | 0   | 2   |
| <b>Vomit</b>        | 197  | 64  | 71  | 904   | 1107 | 1059  | 66  | 14  | 13  | 13  |
| <b>Weak</b>         | 351  | 73  | 71  | 3318  | 1774 | 2291  | 82  | 15  | 30  | 70  |
| <b>Weight loss</b>  | 4    | 19  | 26  | 121   | 119  | 45    | 56  | 0   | 1   | 2   |
| <b>Wound</b>        | 239  | 72  | 71  | 898   | 637  | 1975  | 82  | 21  | 12  | 55  |
